# Supplementary material for: Dysprosium magnesium silicate apatite featuring field and temperature stable slow magnetization relaxation
Source: Royal Society of Chemistry journal article supplement (doi:10.1039/d0ra07069f), 2020-01-01
Supplement: d0ra07069f1.pdf [file d0ra07069f1.pdf]

## Electronic supplementary information

**Table S1.** Crystal structure refinement data for dysprosium magnesium silicate apatite.

|                                                                            |                                                                                 |
|----------------------------------------------------------------------------|---------------------------------------------------------------------------------|
| Temperature (K)                                                            | 293 K                                                                           |
| Wavelength (Å)                                                             | 1.5406                                                                          |
| Formula                                                                    | Dy <sub>8</sub> Mg <sub>2</sub> (SiO <sub>4</sub> ) <sub>6</sub> O <sub>2</sub> |
| Number of reflections                                                      | 283                                                                             |
| Number of data points                                                      | 16749                                                                           |
| Space group                                                                | P6 <sub>3</sub> /m (176)                                                        |
| <i>a</i> (Å)                                                               | 9.3081(2)                                                                       |
| <i>c</i> (Å)                                                               | 6.6742(2)                                                                       |
| <i>V</i> (Å <sup>3</sup> )                                                 | 500.79(2)                                                                       |
| <i>Z</i>                                                                   | 1                                                                               |
| 2θ range (deg.)                                                            | 10 – 120                                                                        |
| <i>R</i> <sub>wp</sub>                                                     | 0.010                                                                           |
| <i>R</i> <sub>all</sub>                                                    | 0.029                                                                           |
| Δ <i>F</i> <sub>max</sub> , Δ <i>F</i> <sub>min</sub> (e Å <sup>-3</sup> ) | 0.84, -1.28                                                                     |

**Table S2.** Atomic parameters and thermal displacement parameters (Å<sup>2</sup>).

| Atom                    | Dy1, Mg1           | Dy2, Mg2           | Si        | O1         | O2         | O3        | O4       |
|-------------------------|--------------------|--------------------|-----------|------------|------------|-----------|----------|
| Site                    | 4f                 | 6h                 | 6h        | 6h         | 6h         | 12i       | 4e       |
| SOF                     | 0.542(3), 0.458(3) | 0.972(3), 0.028(3) | 1         | 1          | 1          | 1         | 1        |
| <i>x</i>                | 1/3                | 0.0070(3)          | 0.4044(7) | 0.3268(13) | 0.6053(14) | 0.3356(7) | 0        |
| <i>y</i>                | 2/3                | 0.23807(17)        | 0.3774(8) | 0.4988(13) | 0.4744(11) | 0.2499(7) | 0        |
| <i>z</i>                | -0.0058(8)         | 1/4                | 1/4       | 1/4        | 1/4        | 0.0665(8) | 0.25     |
| <i>U</i> <sub>iso</sub> | 0.0088(6)          | 0.0088(6)          | 0.014(2)  | 0.023(2)   | 0.023(2)   | 0.023(2)  | 0.023(2) |

**Table S3.** Selected interatomic distances (Å) and angles (degrees). M1 - Dy1,Mg1; M2 - Dy2,Mg2

|       |           |    |          |           |    |
|-------|-----------|----|----------|-----------|----|
| M1-O1 | 2.294(10) | 3x | M1-M2    | 4.036(4)  | 3x |
| M1-O2 | 2.336(10) | 3x | M2-M2    | 3.783(5)  | 2x |
| M1-O3 | 2.806(7)  | 3x | M2-M2    | 3.988(2)  | 4x |
| M2-O1 | 2.743(9)  |    | Si-O1    | 1.617(17) |    |
| M2-O2 | 2.376(19) |    | Si-O2    | 1.620(13) |    |
| M2-O3 | 2.271(5)  | 2x | Si-O3    | 1.600(7)  | 2x |
| M2-O3 | 2.416(6)  | 2x | O1-Si-O2 | 113.9(6)  |    |
| M2-O4 | 2.184(2)  |    | O1-Si-O3 | 111.4(5)  | 2x |
| M1-M1 | 3.260(8)  |    | O2-Si-O3 | 109.6(5)  | 2x |
| M1-M1 | 3.414(8)  |    | O3-Si-O3 | 99.9(4)   |    |
| M1-M2 | 3.992(4)  | 3x |          |           |    |

**Table S4.** Crystal field parameters (in Wybourne notation) derived in the program CONCORD for Dy<sup>3+</sup> using experimental atomic coordinates of the coordination polyhedrons of Dy1 and Dy2 sites (from Table S2). Partial charges on the silicate oxygen atoms and on the intrachannel oxygen atom are -0.5 and -1.0 respectively (adjusted to fit the  $\chi T(T)$  dependence).

| Parameter         | Value (cm <sup>-1</sup> )                     |                                               |                                                     |
|-------------------|-----------------------------------------------|-----------------------------------------------|-----------------------------------------------------|
|                   | Dy1<br>( $a \rightarrow x, c \rightarrow z$ ) | Dy2<br>( $a \rightarrow x, c \rightarrow z$ ) | Dy2<br>( $z$ axis along easy<br>magnetization axis) |
| B <sub>20</sub>   | 865.30001                                     | -456.44591                                    | 1039.1804                                           |
| B <sub>22</sub>   |                                               | -478.43606                                    | 51.5511                                             |
| B <sub>40</sub>   | -180.2481                                     | 172.04854                                     | 300.12362                                           |
| B <sub>42</sub>   |                                               | 10.38332                                      | -48.96352                                           |
| B <sub>43</sub>   | -49.13574                                     |                                               |                                                     |
| B <sub>44</sub>   |                                               | -130.44089                                    | 19.8849                                             |
| B <sub>60</sub>   | -24.02865                                     | -15.41863                                     | 46.54823                                            |
| B <sub>62</sub>   |                                               | -24.56548                                     | -8.69366                                            |
| B <sub>63</sub>   | -10.13758                                     |                                               |                                                     |
| B <sub>64</sub>   |                                               | 5.63719                                       | 6.01144                                             |
| B <sub>66</sub>   | 2.33517                                       | 15.97519                                      | 9.38259                                             |
| B <sub>21</sub>   |                                               |                                               |                                                     |
| B <sub>41</sub>   |                                               |                                               |                                                     |
| B <sub>61</sub>   |                                               |                                               |                                                     |
| B <sub>65</sub>   |                                               |                                               |                                                     |
| B <sub>21</sub> ' |                                               |                                               | -86.03566                                           |
| B <sub>22</sub> ' |                                               | -465.74269                                    |                                                     |
| B <sub>41</sub> ' |                                               |                                               | 129.0388                                            |
| B <sub>42</sub> ' |                                               | 157.53609                                     |                                                     |
| B <sub>43</sub> ' | 72.82336                                      |                                               | -47.05804                                           |
| B <sub>44</sub> ' |                                               | 99.76525                                      |                                                     |
| B <sub>61</sub> ' |                                               |                                               | -0.97924                                            |
| B <sub>62</sub> ' |                                               | -15.08611                                     |                                                     |
| B <sub>63</sub> ' | 21.04695                                      |                                               | 3.06509                                             |
| B <sub>64</sub> ' |                                               | -9.50989                                      |                                                     |
| B <sub>65</sub> ' |                                               |                                               | -9.93864                                            |
| B <sub>66</sub> ' | 8.89063                                       | -8.05367                                      |                                                     |

**Table S5.** Modeling with the program PHI using crystal field parameters listed in Table S4. The KDs of the ground multiplet  ${}^6H_{15/2}$  are shown only.

Dy1

| Energy (cm <sup>-1</sup> ) | $M_J$ (%)    | $g_z$   | $g_x$  | $g_y$   | Probability $M_J \rightarrow -M_J$ |
|----------------------------|--------------|---------|--------|---------|------------------------------------|
| 0                          | 15/2 (99.98) | 19.9987 | 0      | 0       |                                    |
| 88.8457                    | 13/2 (99.89) | 17.2928 | 0.0001 | 0.0001  | 0.1482E-07                         |
| 174.594                    | 11/2 (99.74) | 14.5899 | 0.0001 | 0.0001  | 0.1025E-05                         |
| 255.924                    | 9/2 (99.56)  | 11.8941 | 0      | 0       | 0.2374E-05                         |
| 329.525                    | 7/2 (99.35)  | 9.2140  | 0.1786 | 0.1786  | 0.6794E-02                         |
| 390.907                    | 5/2 (98.85)  | 6.5575  | 0.1867 | 0.1867  | 0.4781E-01                         |
| 435.255                    | 3/2 (68.38)  | 3.9753  | 0      | 0       | 0.1134E+01                         |
| 458.574                    | 1/2 (85.41)  | 10.6476 | 1.3062 | 10.6476 | 0.1451E+02                         |

Dy2

| Energy (cm <sup>-1</sup> ) | $M_J$ (%)    | $g_z$   | $g_x$  | $g_y$  | Probability $M_J \rightarrow -M_J$ |
|----------------------------|--------------|---------|--------|--------|------------------------------------|
| 0                          | 15/2 (100)   | 19.9995 | 0      | 0      |                                    |
| 173.782                    | 13/2 (99.65) | 17.2847 | 0.0001 | 0.0001 | 0.2161E+00                         |
| 309.937                    | 11/2 (99.80) | 14.6404 | 0.0018 | 0.0021 | 0.8260E-06                         |
| 409.580                    | 9/2 (98.33)  | 12.0442 | 0.0022 | 0.0060 | 0.4562E+00                         |
| 477.071                    | 7/2 (95.27)  | 9.2474  | 0.7490 | 1.0345 | 0.7807E-01                         |
| 516.887                    | 5/2 (71.48)  | 7.3335  | 4.4427 | 6.8338 | 0.8383E+01                         |
|                            | 1/2 (18.71)  |         |        |        |                                    |
| 550.317                    | 3/2 (58.46)  | 13.8204 | 1.0457 | 2.1845 | 0.1680E+02                         |
|                            | -1/2 (15.55) |         |        |        |                                    |
|                            | -5/2 (22.67) |         |        |        |                                    |
| 586.637                    | 1/2 (65.00)  | 18.7428 | 0.0527 | 0.1175 | 0.3001E+02                         |
|                            | -3/2 (29.68) |         |        |        |                                    |

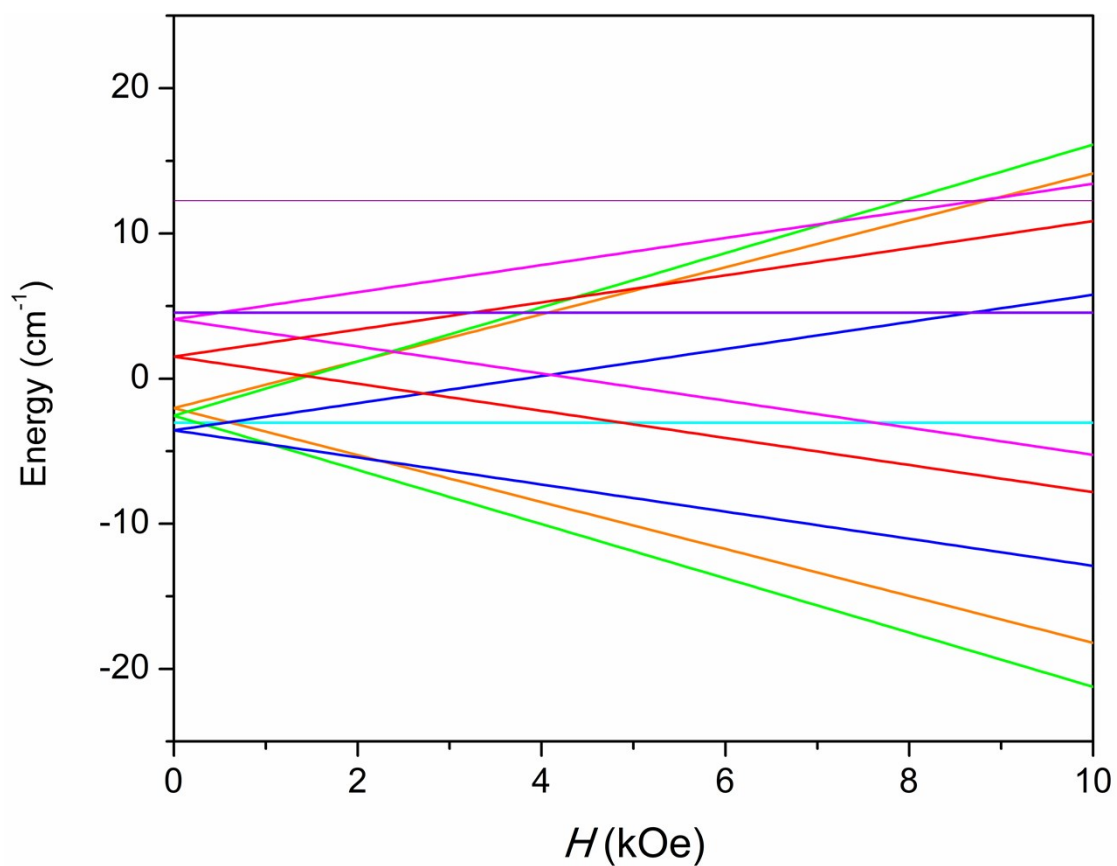

**Fig. S1.** Modeled energy diagram (KDs and singlets) for the  $(\text{Dy}_2)_6$  cluster and the level splitting in magnetic field along the easy magnetization axis of the cluster. The calculations were based on the experimental atomic positions taking into consideration dipole interactions only.

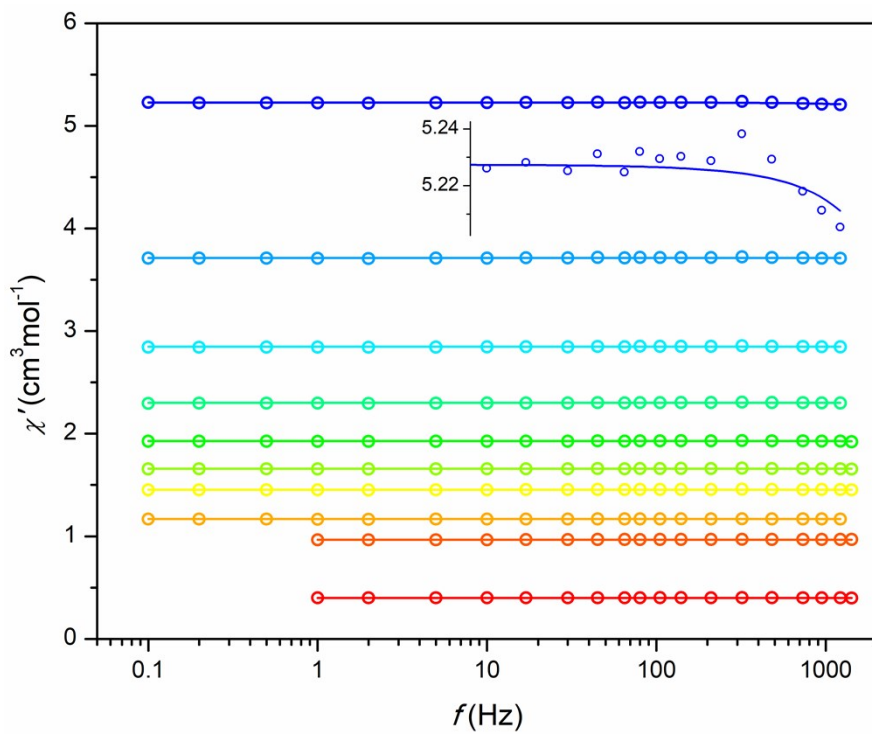

(a)

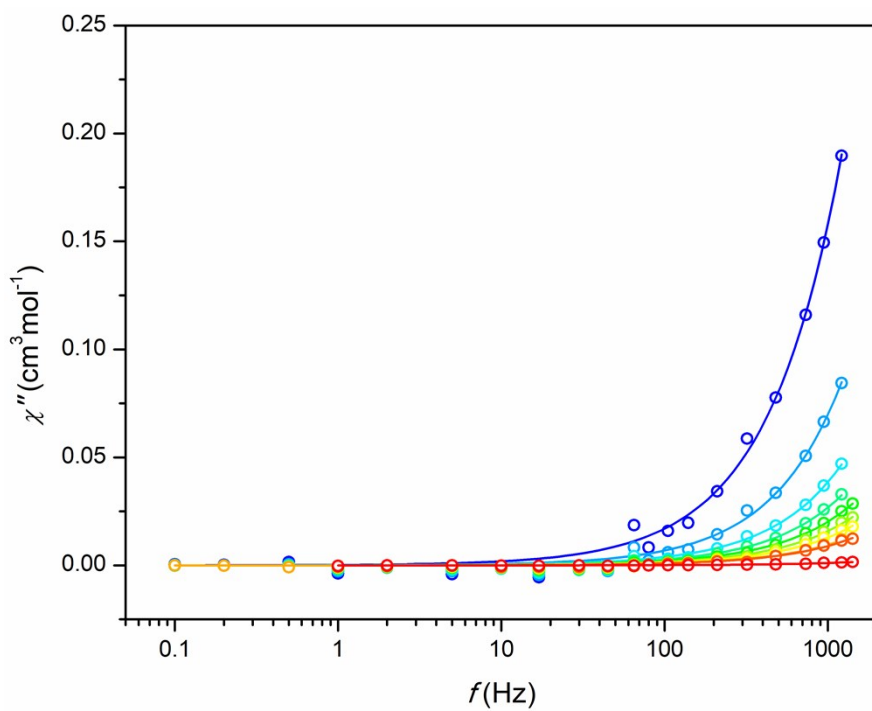

(b)

**Figure S2.** Frequency dependence of ac susceptibility per mol of Dy for  $\text{Dy}_8\text{Mg}_2(\text{SiO}_4)_6\text{O}_2$  at different temperatures under a zero field. (a) – in-phase susceptibility  $\chi'$ , (b) – out-of-phase susceptibility  $\chi''$ . Symbols – experimental points, lines – fitting. Color designation: blue – green – yellow – red,  $T = 2 - 8$  K (step 1 K),  $T = 10, 12, 30$  K, respectively.

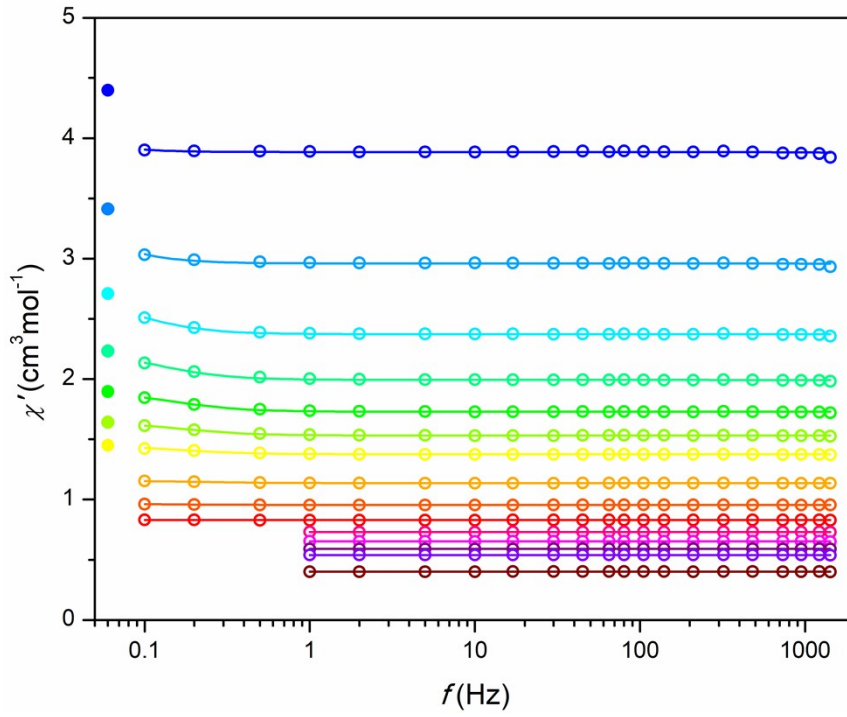

(a)

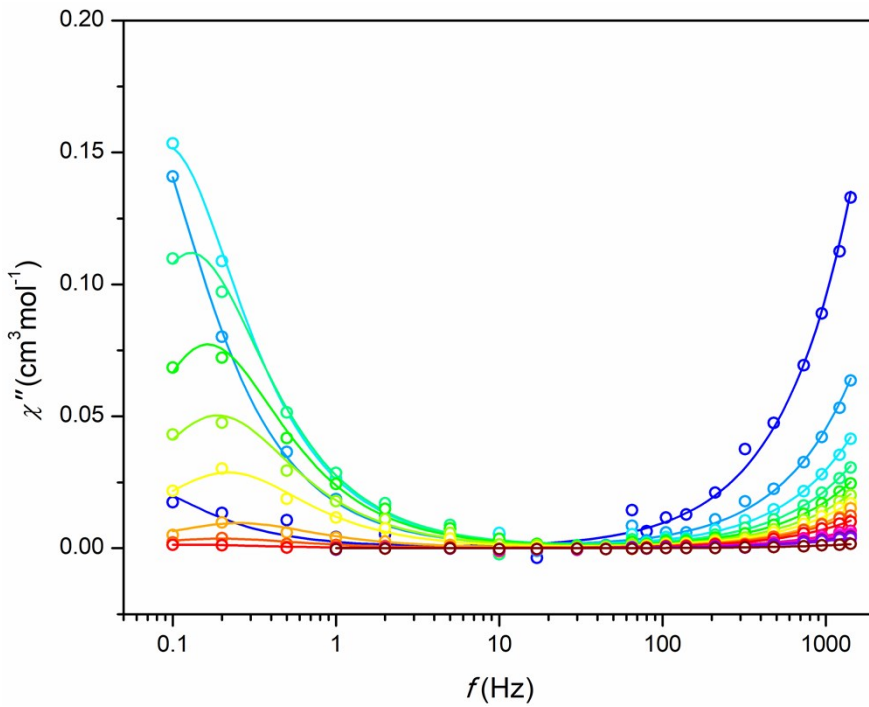

(b)

**Figure S3.** Frequency dependence of ac susceptibility per mol of Dy for  $\text{Dy}_8\text{Mg}_2(\text{SiO}_4)_6\text{O}_2$  at different temperatures under a field of 1.5 kOe. (a) – in-phase susceptibility  $\chi'$ , (b) – out-of-phase susceptibility  $\chi''$ . Open circles – experimental points, lines – fitting. Full circles on the left-side in (a) – experimental values of differential dc susceptibility under a field of 1.5 kOe (equal to  $\chi_0$ ). Color designation: blue – green – yellow – magenta – violet – wine,  $T = 2 - 8$  K (step 1 K),  $T = 10 - 22$  K (step 2 K),  $T = 30$  K, respectively.

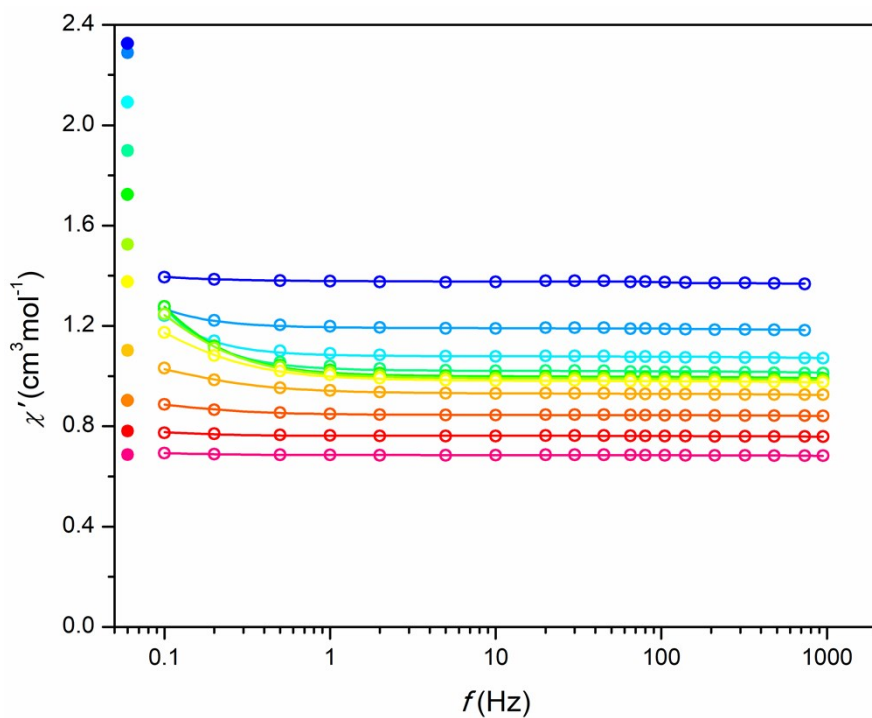

(a)

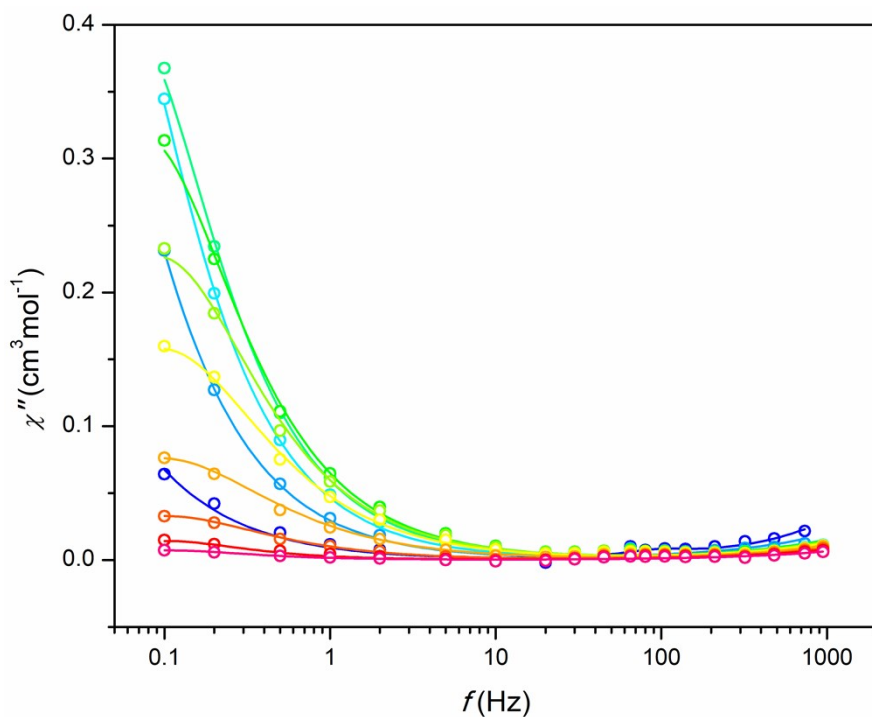

(b)

**Figure S4.** Frequency dependence of ac susceptibility per mol of Dy for  $\text{Dy}_8\text{Mg}_2(\text{SiO}_4)_6\text{O}_2$  at different temperatures under a field of 4 kOe. (a) – in-phase susceptibility  $\chi'$ , (b) – out-of-phase susceptibility  $\chi''$ . Open circles – experimental points, lines – fitting. Full circles on the left-side in (a) – experimental values of differential dc susceptibility under a field of 4 kOe (equal to  $\chi_0$ ). Color designation: blue – green – yellow – magenta,  $T = 2 - 8$  K (step 1 K),  $T = 10 - 20$  K (step 2 K), respectively.

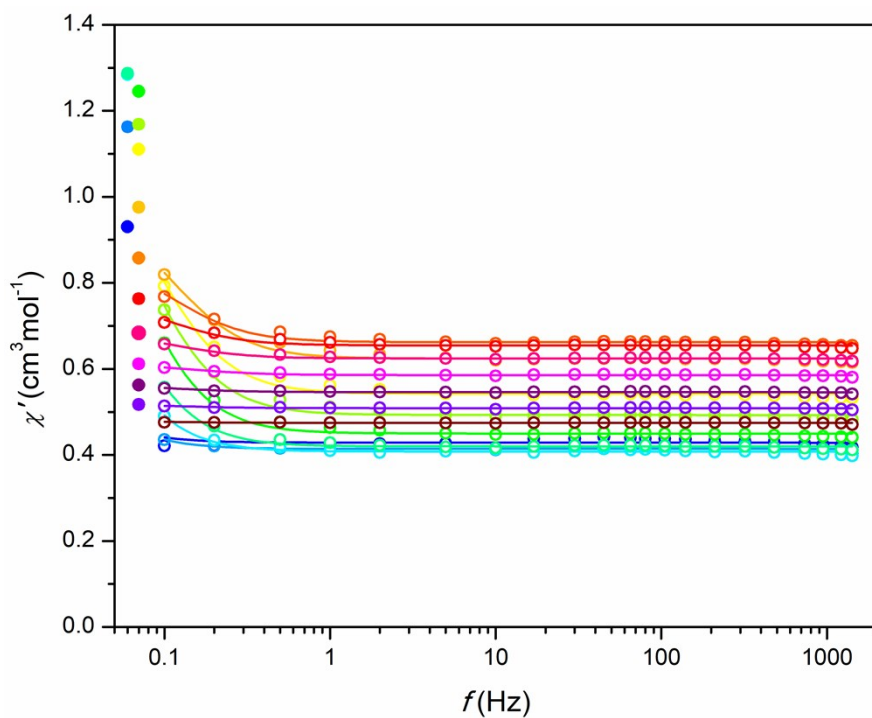

(a)

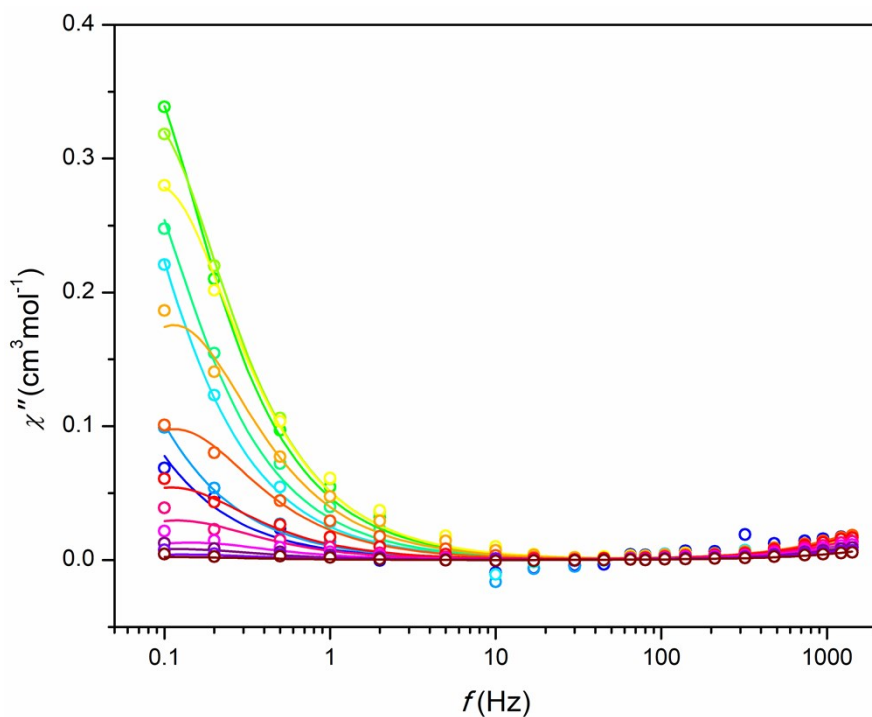

(b)

**Figure S5.** Frequency dependence of ac susceptibility per mol of Dy for  $\text{Dy}_8\text{Mg}_2(\text{SiO}_4)_6\text{O}_2$  at different temperatures under a field of 8 kOe. (a) – in-phase susceptibility  $\chi'$ , (b) – out-of-phase susceptibility  $\chi''$ . Open circles – experimental points, lines – fitting. Full circles on the left-side in (a) – experimental values of differential dc susceptibility under a field of 8 kOe (equal to  $\chi_0$ ). Color designation: blue – green – yellow – magenta – violet – wine,  $T = 2 - 8$  K (step 1 K),  $T = 10 - 24$  K (step 2 K), respectively.



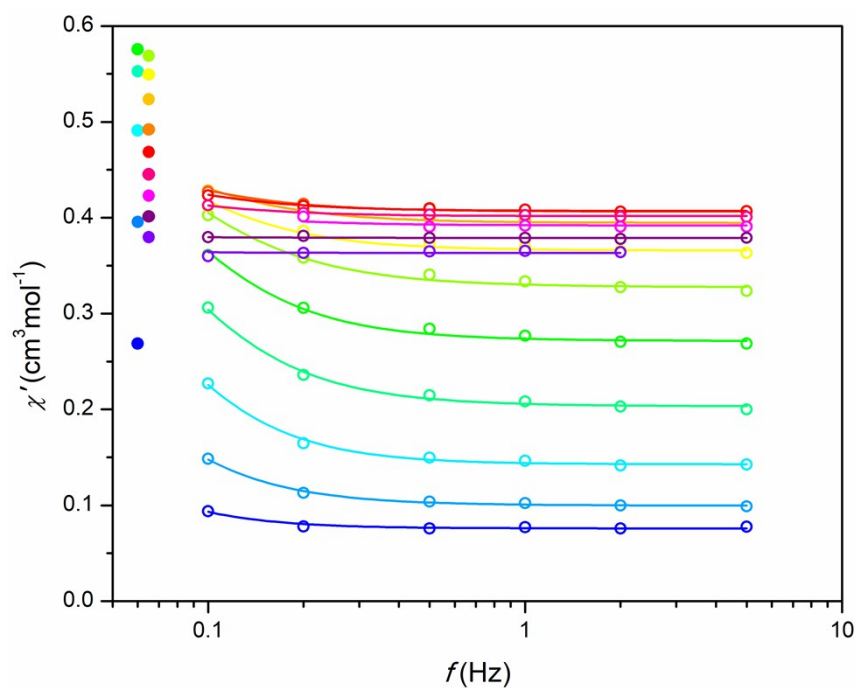

(a)

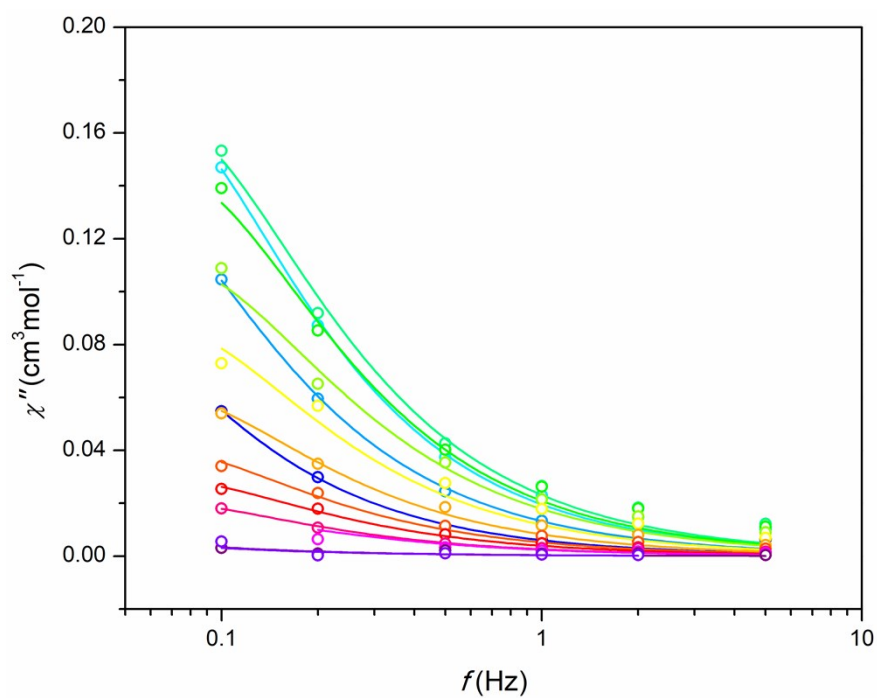

(b)

**Figure S6.** Frequency dependence of ac susceptibility per mol of Dy for  $\text{Dy}_8\text{Mg}_2(\text{SiO}_4)_6\text{O}_2$  at different temperatures under a field of 20 kOe. (a) – in-phase susceptibility  $\chi'$ , (b) – out-of-phase susceptibility  $\chi''$ . Open circles – experimental points, lines – fitting. Full circles on the left-side in (a) – experimental values of differential dc susceptibility under a field of 20 kOe (equal to  $\chi_0$ ). Color designation: blue – green – yellow – magenta – violet,  $T = 4 - 30$  K (step 2 K), respectively.

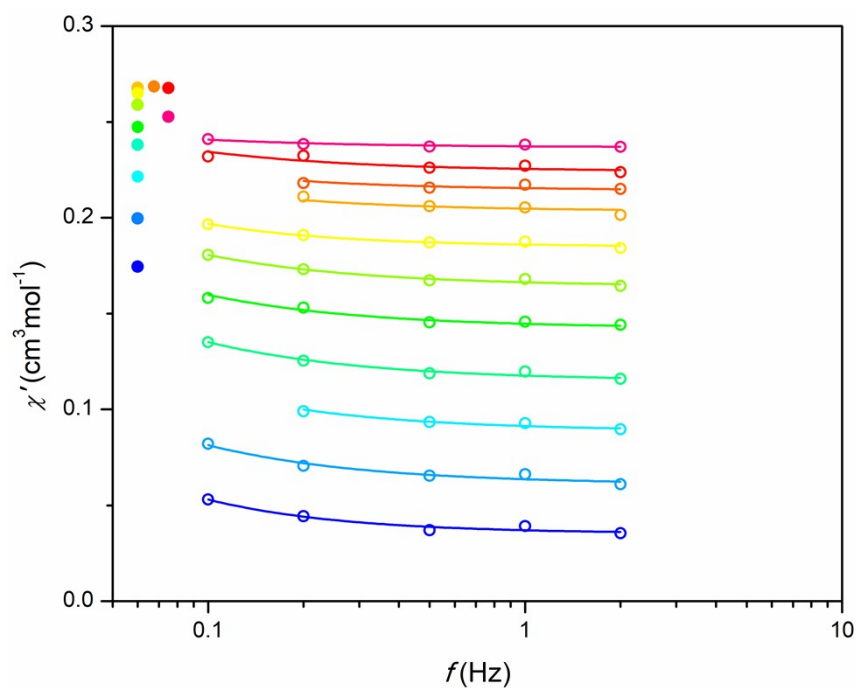

(a)

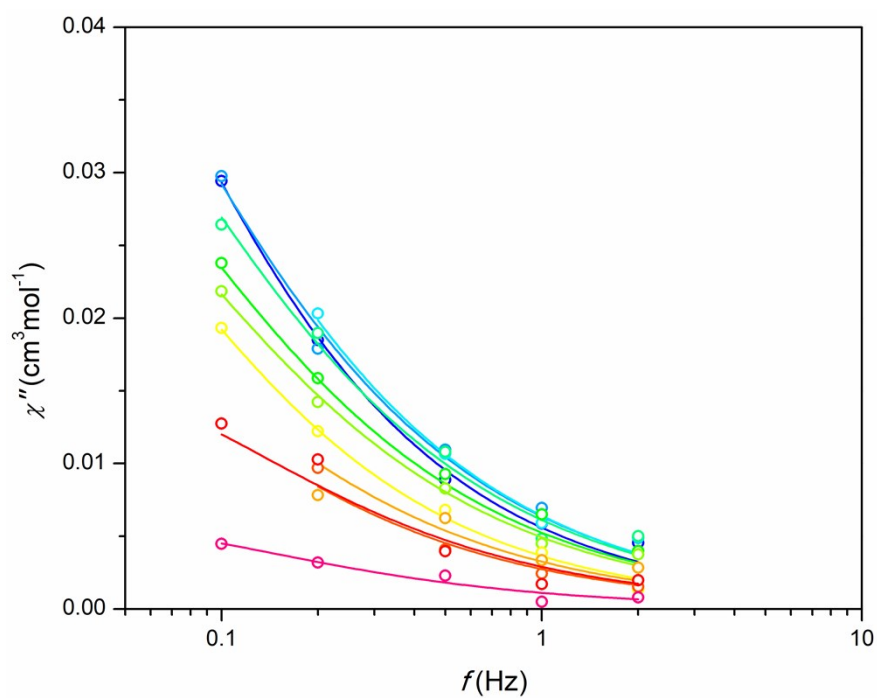

(b)

**Figure S7.** Frequency dependence of ac susceptibility per mol of Dy for  $\text{Dy}_8\text{Mg}_2(\text{SiO}_4)_6\text{O}_2$  at different temperatures under a field of 50 kOe. (a) – in-phase susceptibility  $\chi'$ , (b) – out-of-phase susceptibility  $\chi''$ . Open circles – experimental points, lines – fitting. Full circles on the left-side in (a) – experimental values of differential dc susceptibility under a field of 50 kOe (equal to  $\chi_0$ ). Color designation: blue – green – yellow – rose,  $T = 12 - 30$  K (step 2 K),  $T = 40$  K, respectively.

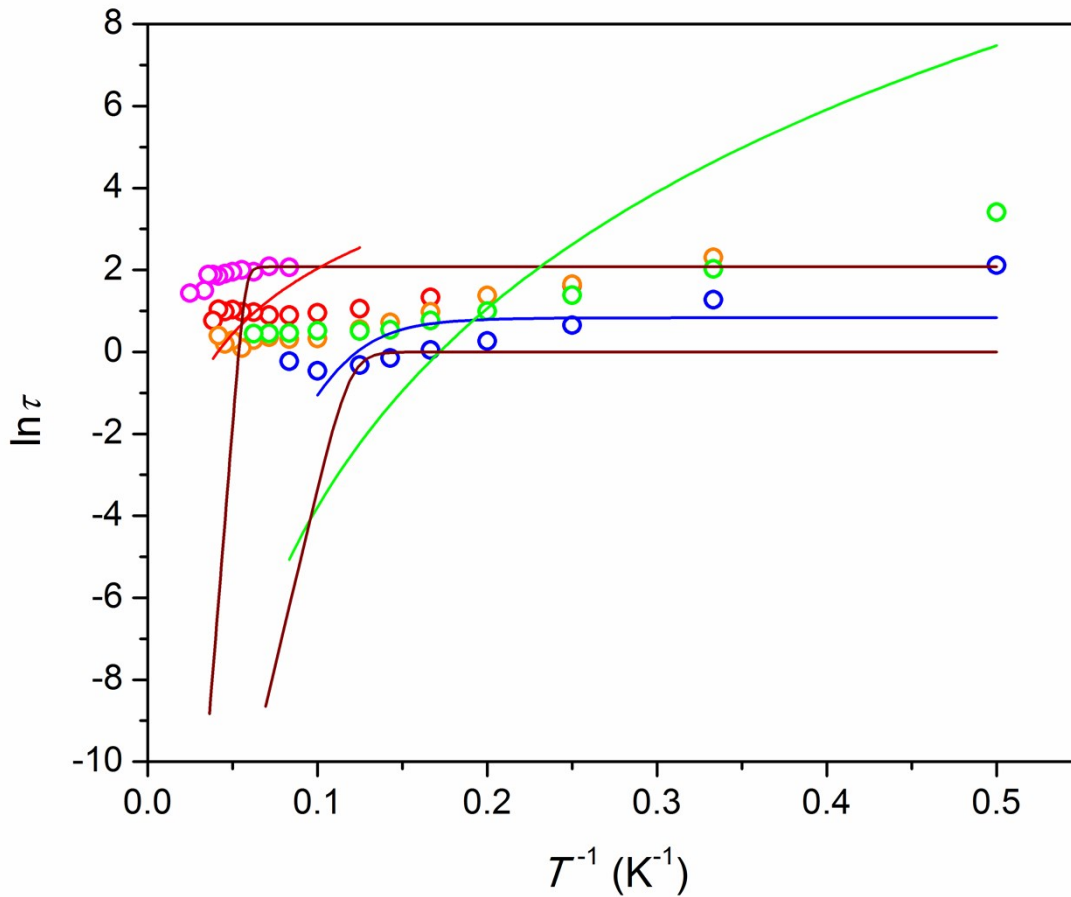

**Figure S8.** Temperature dependence of  $\ln \tau$  for the SR path in the Dy-Mg silicate apatite. Experimental points – symbols; blue, green, orange, red, and magenta – under a field of 1.5, 4, 8, 20, and 50 kOe, respectively. Lines – modeling and fitting. Brown lines – modeling of the relaxation taking into consideration the Orbach and QTM mechanisms:  $1/\tau = 1/\tau_{\text{QTM}} + (1/\tau_0)\exp(-U_{\text{eff}}/kT)$ ; upper line –  $U_{\text{eff}} = 517 \text{ cm}^{-1}$  (calculated energy of the 5<sup>th</sup> excited KD for the Dy2 site),  $\tau_0 = 10^{-12} \text{ s}$ ,  $\tau_{\text{QTM}} = 8 \text{ s}$ ; lower line –  $U_{\text{eff}} = 174 \text{ cm}^{-1}$  (calculated energy of the first excited KD for the Dy2 site),  $\tau_0 = 10^{-9} \text{ s}$ ,  $\tau_{\text{QTM}} = 1 \text{ s}$ . Green and red lines – fitting the relaxation time using the Raman mechanism for the data under a field of 1.5 and 20 kOe respectively:  $1/\tau = cT^n$ ; green line –  $n = 7$  (low temperature region),  $c = 4.4 \cdot 10^{-6} \text{ s}^{-1} \text{ K}^{-n}$ ; red line –  $n = 2.3$  (high temperature region),  $c = 6.6 \cdot 10^{-4} \text{ s}^{-1} \text{ K}^{-n}$ . The Raman mechanism is considered as a Raman I. A field dependent Raman II is discarded since, according to this mechanism,  $\tau$  has to decrease fast with the increasing magnetic field in a high field region, whereas, in the experiment,  $\tau$  gradually grows with the increasing field.
